# Supplementary material
Source: PubMed Central journal article supplement (PMC1224690)
Supplement: 7600800s1.pdf [file 7600800s1.pdf]

# Supplemental Figure 1

**A**

```

EF-ACD-CaM          >-Switch B<                                     >-----Switch C-----<
EF-ACD alone          SSSSSS  SSSSSS  HHHHHHHHHHHH  SSS                                     SSS  SSS  HHHH
EF-ACD (575)  VNHGTEQDNEEFPEKDNEIFIINPEGEFILTKNWEMTGRFIEKNIITGKDYLFFNRSYNKIAPGNKAYIEWTDP.ITKAKINTIPTSAEF
CyaA-ACD (296)  VQHGTEQ.NNPFPEADEKIFVVSATGESQMLTRGQLKEYIGQQ..RGEQYVFYENRAYGVAGKSLFDDGLGAAPGVPSGRSKFSPDVLET

                                     354                                     373

EF-ACD alone  HHHHHHHHHHHH  SSS  HHHHHHHHHHHHHHHHHHHHH  HH  HHHHHHHHHHHHHHHHHHHHHHH
EF-ACD (665)  IKNLSSIRRSSNVGVYKDSGDKDEFAKKESVKKIAGYLSDYNSANHIFSQEKKRKISIFRGIQAYNEIE
CyaA-ACD (383)  VPASPGLRRPSLGAVERQDSGYDSLGVGSRFSLSLGEVSDMAAVEAAELEMTR.....QVLH

                                     386  393  399  412
    
```

**B**

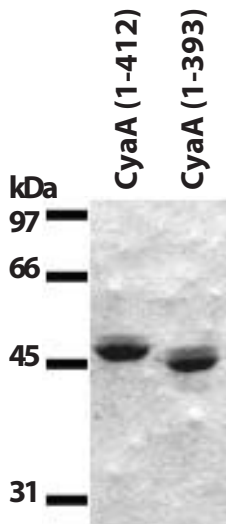

**C**

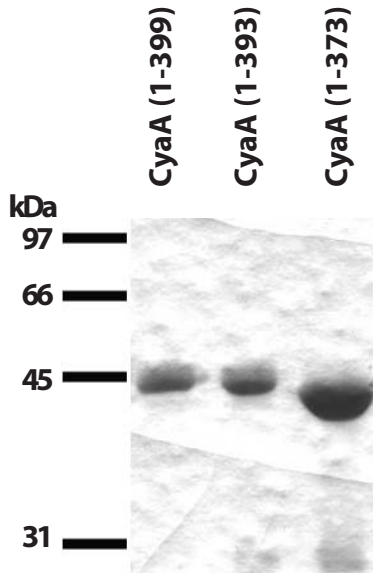

**D**

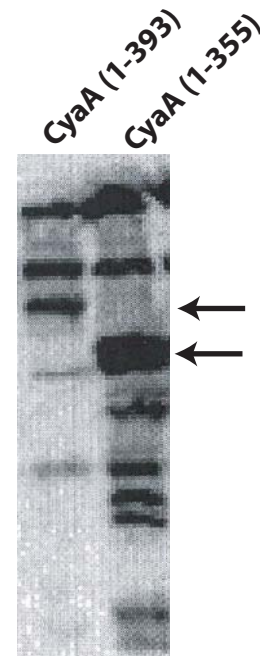

**E**

| CyaA-ACD constructs      | Specific Activity (μmol/min/mg) |
|--------------------------|---------------------------------|
| <b>Purified proteins</b> |                                 |
| CyaA (1-393)             | 3,376                           |
| CyaA (1-373)             | 6,779                           |
| <b>Lysates</b>           |                                 |
| CyaA (1-412)             | 26                              |
| CyaA (1-399)             | 31                              |
| CyaA (1-393)             | 69                              |
| CyaA (1-355)             | 0.07                            |

**F**

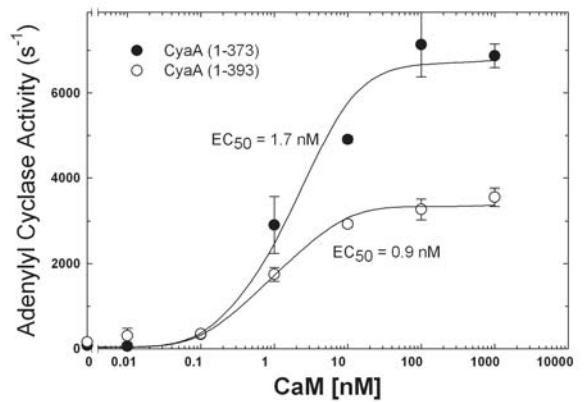

**Characterization of CyaA-ACD truncation mutants. (A) Schematic diagram of the CyaA-ACD termination site. A comparison of EF and CyaA-ACD with the secondary structure of EF-ACD is shown on top, and the last residue of the CyaA-ACD mutants is indicated on the bottom. These mutants were designed based on sequence comparison between EF-ACD and CyaA-ACD, and the secondary structure of EF-ACD. Switch B and switch C are defined according to the structures of EF-ACD and CaM-bound EF-ACD-CaM (Drum et al., 2002, *Nature*, 415, 396-402). (B) Purified CyaA (1-412) and CyaA (1-393) proteins on an SDS-PAGE gel. (C) Purified CyaA(1-399), CyaA (1-393) and CyaA (1-373) proteins on an SDS-PAGE gel. Two  $\mu\text{g}$  of protein was loaded in both B and C and stained with Coomassie blue. (D) Immunoblot analysis of lysates of CyaA (1-393) and CyaA (1-355). Rabbit polyclonal antibody against CyaA-ACD was used. The expression of CyaA (1-355) is comparable to that of CyaA (1-393). No observable immunoblot or detectable adenylyl cyclase activity could be found for CyaA-ACD (1-386) (not shown). (E) Adenylyl cyclase activities of CyaA-ACD mutants. Experiments were performed in the presence of 100  $\mu\text{g}$  *E. coli* lysate or 5 ng purified protein, 10 mM CaM, 5 mM ATP, 10 mM  $\text{Mg}^{2+}$  and 1mM  $\text{Ca}^{2+}$ . (F) CaM-dependent adenylyl cyclase activities of CyaA (1-393) and CyaA (1-373). Five ng purified protein, 5 mM ATP, 10 mM  $\text{Mg}^{2+}$ , 1mM  $\text{Ca}^{2+}$  and indicated CaM were included in the experiments.**
