# Supplementary material
Source: PubMed Central journal article supplement (PMC1224690)
Supplement: 7600800s2.pdf [file 7600800s2.pdf]

## Supplemental Figure 2

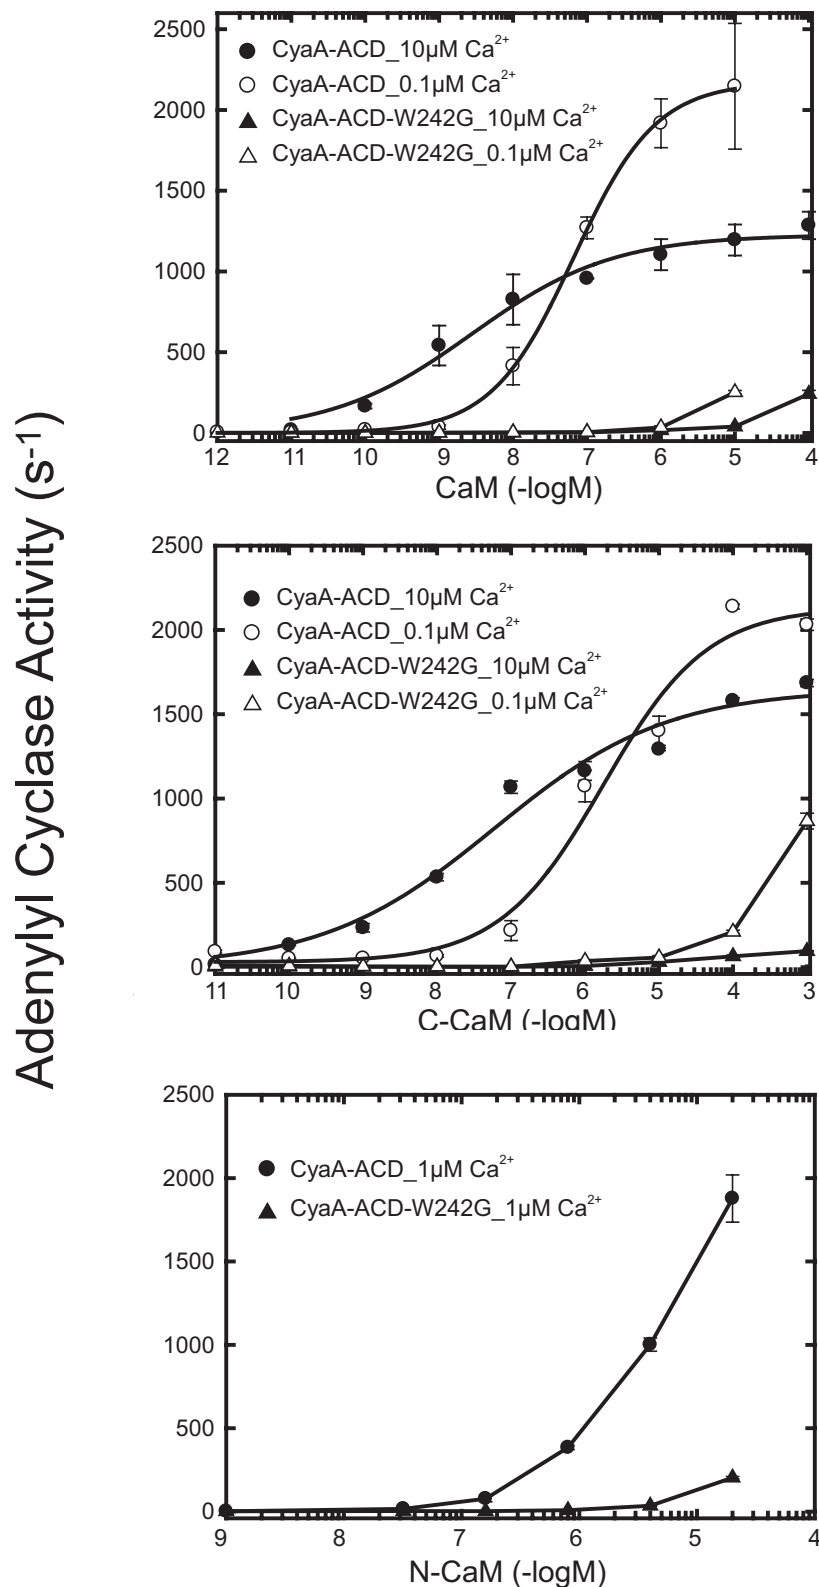

The adenylyl cyclase activities of CyaA-ACD and CyaA-ACD-W242G in the presence of the indicated CaM(A), C-CaM(B), N-CaM(C) concentrations and free Ca<sup>2+</sup> concentrations. Adenylyl cyclase assays were performed for 10 minutes in the presence of 1 ng CyaA-ACD and CyaA-ACD-W242G in the presence of 5mM ATP, 10mM free Mg<sup>2+</sup>, and 1mM EGTA. Means ± SE are representative of at least two experiments.
