# Supplementary material
Source: PubMed Central journal article supplement (PMC1224690)
Supplement: 7600800s3.pdf [file 7600800s3.pdf]

## Supplemental Figure 3

**A**

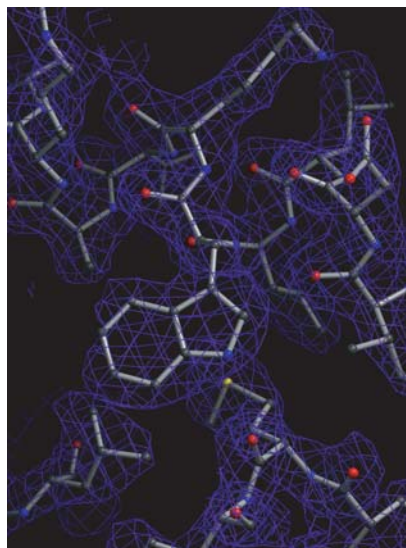

**B**

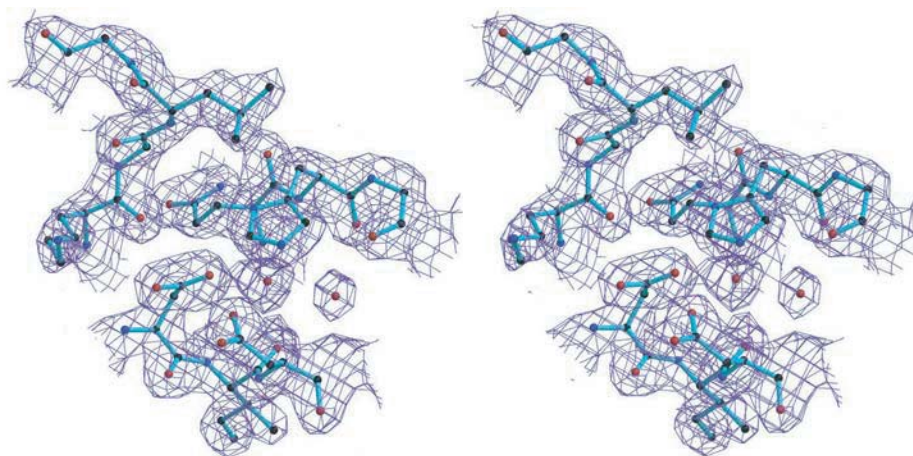

**C**

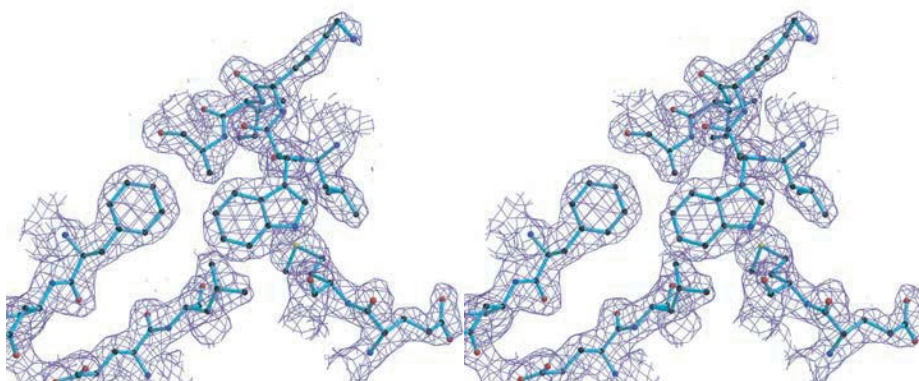

**Electron density maps of the C-CaM-bound CyaA-ACD. The representative composite omit map of the interface of CyaA-ACD and C-CaM (A), 2Fo-Fc map of the catalytic domain (B) and the CaM binding region of CyaA (C) are shown. Carbon, oxygen, and nitrogen are colored black, red, and blue, respectively. Both the composite omit map and the 2Fo-Fc electron density map are contoured at  $1\sigma$  cutoff and calculated at a resolution of 2.1 Å.**
