# Supplementary material
Source: PubMed Central journal article supplement (PMC1224690)
Supplement: 7600800s4.pdf [file 7600800s4.pdf]

## Supplemental Figure 4

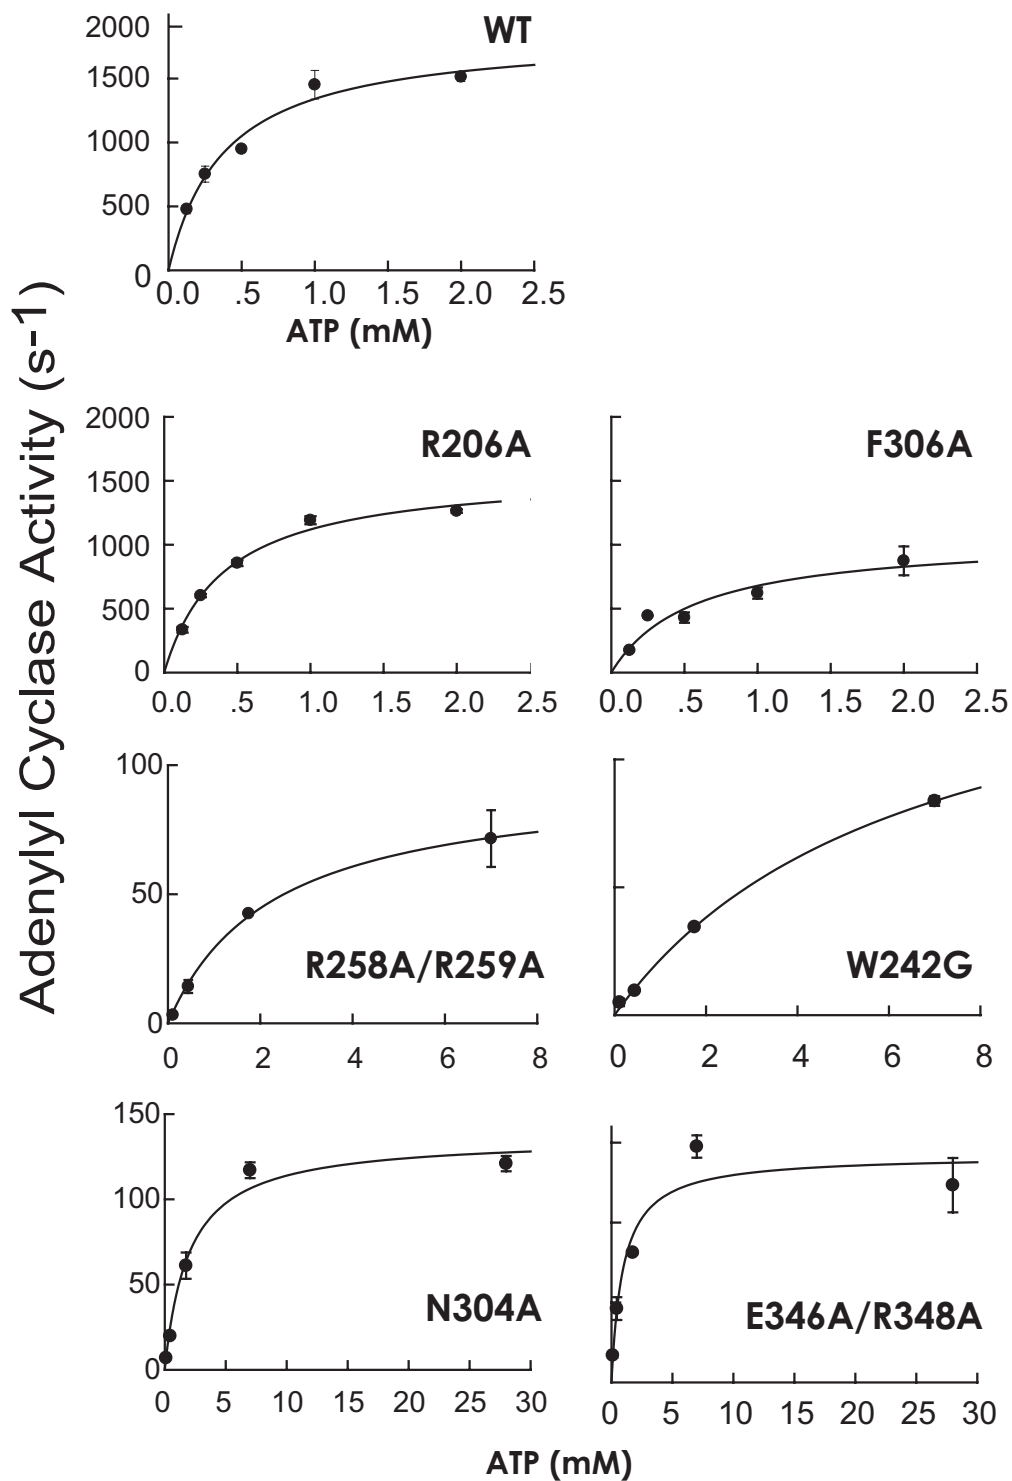

**Michaelis-Menten profile of wild type (WT) CyaA-ACD and six CyaA-ACD mutants. Adenylyl cyclase assays were performed in the presence of 10 mM MgCl<sub>2</sub>, 10 μM CaM, 10 μM free Ca<sup>2+</sup> and the indicated ATP concentrations.**
