# Supplementary material
Source: PubMed Central journal article supplement (PMC1224690)
Supplement: 7600800s5.pdf [file 7600800s5.pdf]

## Supplemental Figure 5

**A**

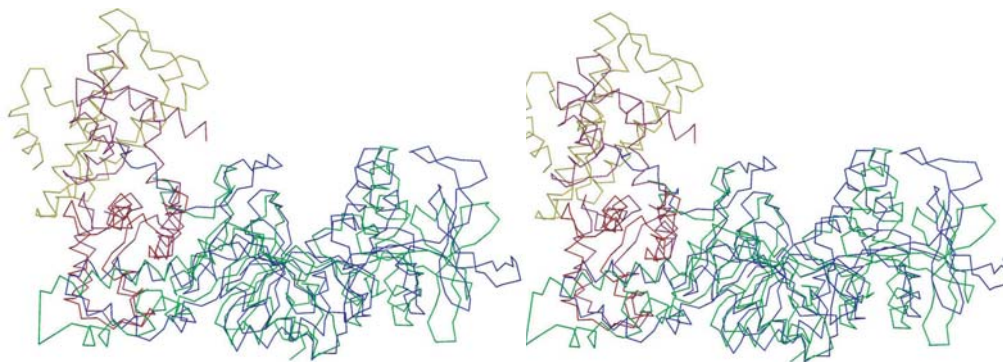

**B**

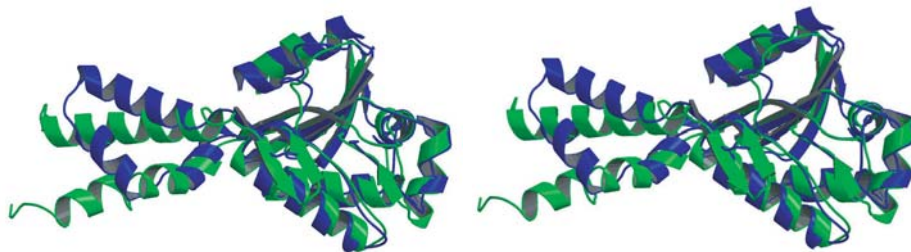

**C**

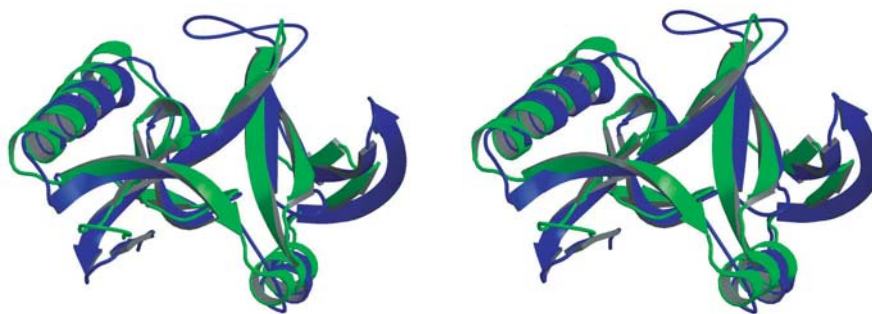

**Structural comparison of CyaA-ACD with EF-ACD. (A) Global structural alignment of two proteins. CyaA-ACD is colored green. The catalytic core of EF is colored blue, the helical domain of EF is yellow. C-CaM associated with CyaA-ACD is colored red while CaM in complex with EF is magenta. The alignment of the C<sub>A</sub> (B) and C<sub>B</sub> domains (C) of CyaA and EF are shown with CyaA colored green and EF blue.**
