# Supplementary material
Source: PubMed Central journal article supplement (PMC1224690)
Supplement: 7600800s6.pdf [file 7600800s6.pdf]

## Supplemental Figure 6

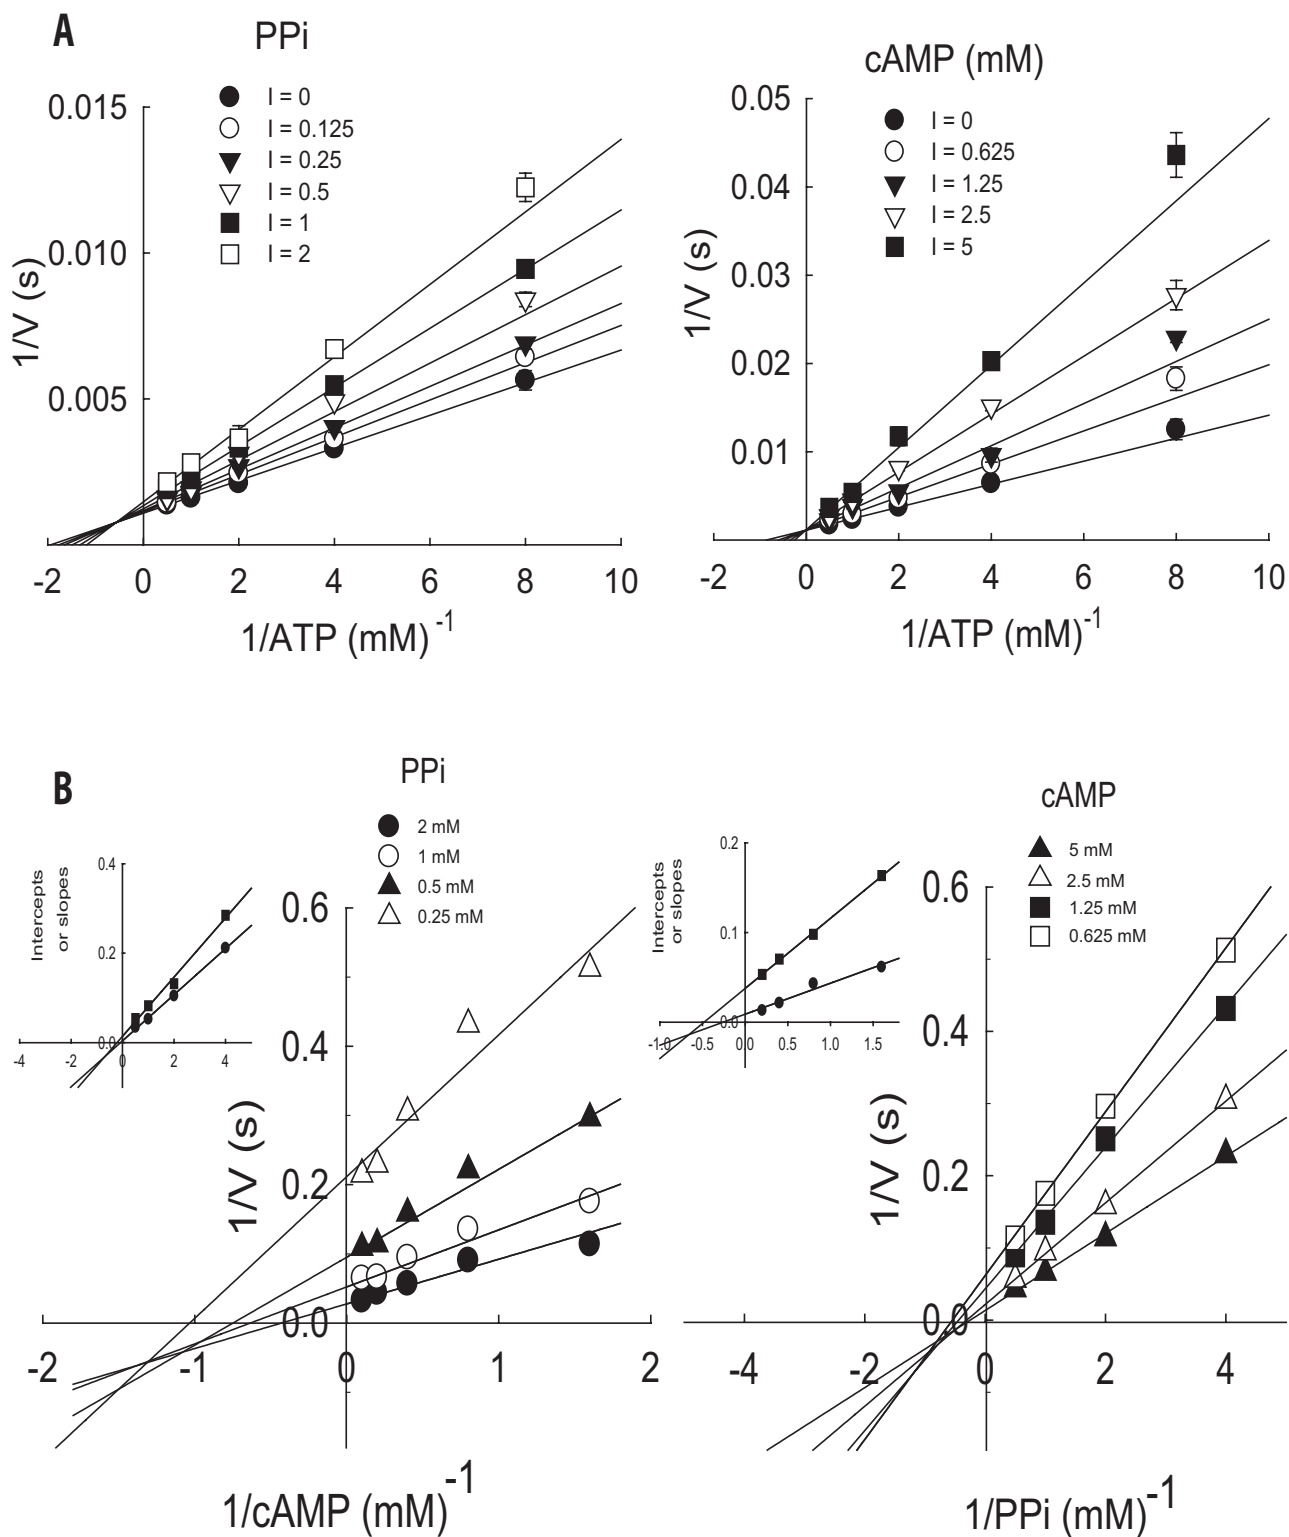

**Kinetic analysis of CyaA-ACD. (A) Product inhibition of CyaA-ACD adenylyl cyclase activity. (B) ATP synthesis by CyaA with variable concentrations of cAMP and PPI. Assays were performed in the presence of 10 mM MgCl<sub>2</sub>, 10 μM CaM, and the indicated ATP, cAMP, and PPI concentrations at 2 μM free Ca<sup>2+</sup> with either 1 nM CyaA-ACD (A) or 2.2 nM CyaA-ACD (B). Data are representative of at least two experiments.**
