# Supplementary material
Source: PubMed Central journal article supplement (PMC1224690)
Supplement: 7600800s7.pdf [file 7600800s7.pdf]

## Supplemental Figure 7

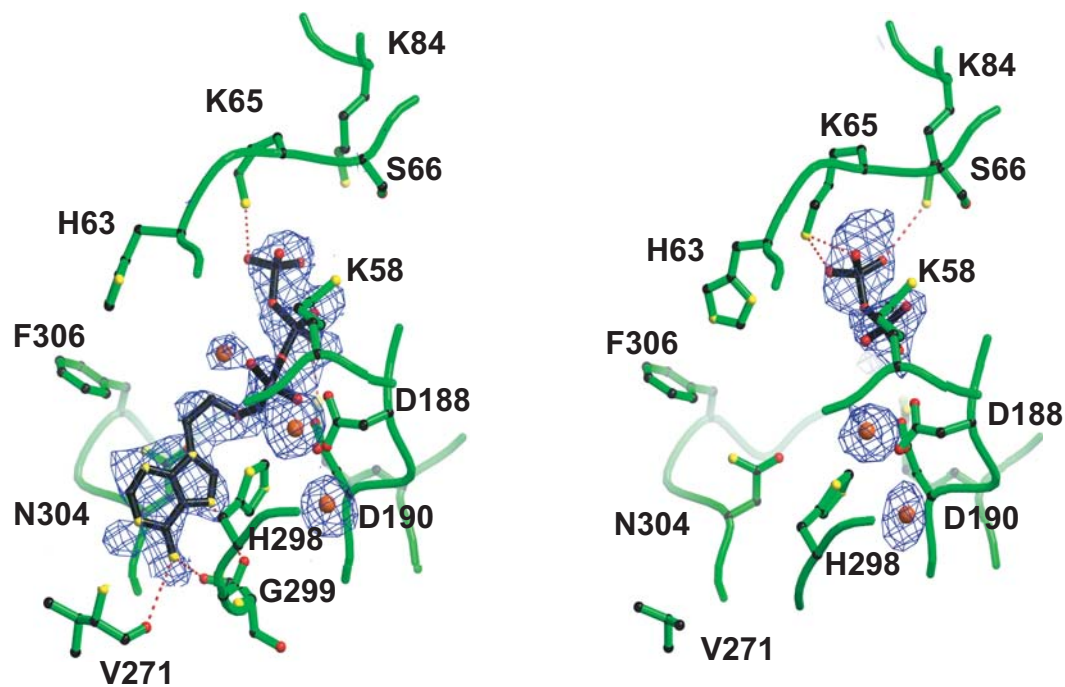

**Nucleotide binding of CyaA. Active site of CyaA in the presence of adefovir diphosphate (left) and pyrophosphate (right). The simulated annealing omit map was contoured at 2.7  $\sigma$ . The main chains of CyaA-ACD are colored green, and the atoms of carbon, oxygen, and nitrogen are black, red, and yellow. Hydrogen bonds are represented in red.**
