# Supplementary material
Source: PubMed Central journal article supplement (PMC1224690)
Supplement: 7600800s8.pdf [file 7600800s8.pdf]

**Supplemental Table 1 Crystallographic statistics of SeMet-CyaA-ACD/C-CaM**

| SeMet-CyaA-ACD/C-CaM      |                                  |                                  |                                  |
|---------------------------|----------------------------------|----------------------------------|----------------------------------|
| <b>Data Collection</b>    |                                  |                                  |                                  |
| Beamline                  | APS ID-19                        | APS ID-19                        | APS ID-19                        |
|                           | Inflection                       | Peak                             | Remote                           |
| Wavelength (Å)            | 0.97948                          | 0.97929                          | 0.95645                          |
| Space group               | P4 <sub>1</sub> 2 <sub>1</sub> 2 | P4 <sub>1</sub> 2 <sub>1</sub> 2 | P4 <sub>1</sub> 2 <sub>1</sub> 2 |
|                           | Cell dimension(Å)                |                                  |                                  |
| a                         | 79.9                             | 79.9                             | 79.9                             |
| b                         | 79.9                             | 79.9                             | 79.9                             |
| c                         | 141.6                            | 141.6                            | 141.6                            |
| Resolution (Å)            | 30-3.1                           | 30-3.1                           | 30-3.5                           |
| Rsym (%) <sup>a</sup>     | 14.8(36.8) <sup>e</sup>          | 13.5(41.6) <sup>e</sup>          | 16.5(39.4) <sup>e</sup>          |
| I/sigma                   | 12.1(3.7) <sup>e</sup>           | 13.1(2.3) <sup>e</sup>           | 9.1(4.8) <sup>e</sup>            |
| Redundancy <sup>b</sup>   | 6.5(3.5) <sup>e</sup>            | 6.5(5.4) <sup>e</sup>            | 7.1(4.9) <sup>e</sup>            |
| Completeness (%)          | 97.6(90.1) <sup>e</sup>          | 99.3(99.2) <sup>e</sup>          | 97.8(96.4) <sup>e</sup>          |
| Phasing power (acentrics) |                                  |                                  |                                  |
| Isomorphous               | 0.66                             | N/A <sup>f</sup>                 | 0.36                             |
| Anomalous                 | 0.92                             | 1.78                             | 0.0                              |
| Phasing power (centrics)  |                                  |                                  |                                  |
| Isomorphous               | 0.452                            | N/A                              | 0.27                             |
| FOM (acentrics)           |                                  | 0.53                             |                                  |
| FOM (centrics)            |                                  | 0.29                             |                                  |

<sup>a</sup>  $R_{\text{sym}} = \sum_j | \langle I \rangle - I_j | / \sum \langle I \rangle$  where  $I_j$  is the intensity of the  $j$ th reflection and  $\langle I \rangle$  is the average intensity.

<sup>b</sup>  $N_{\text{obs}}/N_{\text{unique}}$ . <sup>c</sup>  $R_{\text{work}} = \sum_{\text{hkl}} |F_{\text{obs}} - F_{\text{calc}}| / \sum_{\text{hkl}} F_{\text{obs}}$ . <sup>d</sup>  $R_{\text{free}}$ , calculated the same as for  $R_{\text{work}}$  but on the 5% data excluded from the refinement calculation. <sup>e</sup> the outer resolution shell. <sup>f</sup> not applicable.
