# Supplementary material
Source: PubMed Central journal article supplement (PMC1224690)
Supplement: 7600800s9.pdf [file 7600800s9.pdf]

| Supplemental table 2 Kinetic parameters for CyaA-ACD |                                                                                                                                                                        |
|------------------------------------------------------|------------------------------------------------------------------------------------------------------------------------------------------------------------------------|
| Forward reaction                                     | $V_{\max} = 920 \text{ s}^{-1}$<br>$K_m = 0.8 \pm 0.3 \text{ mM}$<br>$K_{i(\text{PPi})} = 0.6 \pm 0.1 \text{ mM}^*$<br>$K_{i(\text{cAMP})} = 1.2 \pm 0.2 \text{ mM}^*$ |
| Reverse reaction                                     | $V_{\max} = 71 \text{ s}^{-1}$<br>$K_{d(\text{cAMP})} = 3.8 \text{ mM}^*$<br>$K_{d(\text{PPi})} = 2.0 \text{ mM}^*$                                                    |

\*The inhibitory and dissociation constants,  $K_i$  and  $K_d$  is the apparent  $K_i$  and  $K_d$  determined by kinetic analysis, not by direct binding assays. The adenylyl cyclase assays were performed in the presence of 2  $\mu\text{M}$  free calcium concentration and 1  $\mu\text{M}$  CaM (Guo et al J. Biol. Chem. 279:29427-29435, 2004).
